# Supplementary material
Source: PubMed Central journal article supplement (PMC6066671)
Supplement: NIHMS832505-supplement-4.pdf [file NIHMS832505-supplement-4.pdf]

## T Regulatory

### V $\beta$ 8.2 Germline Sequence

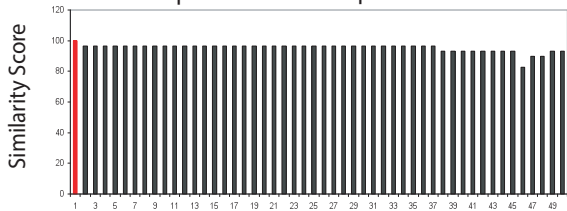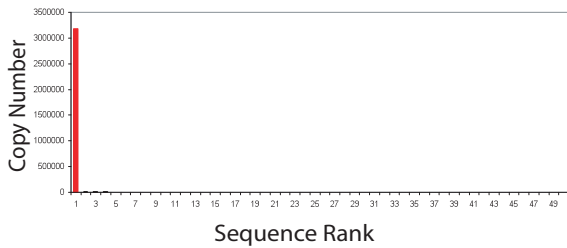

### CDR3

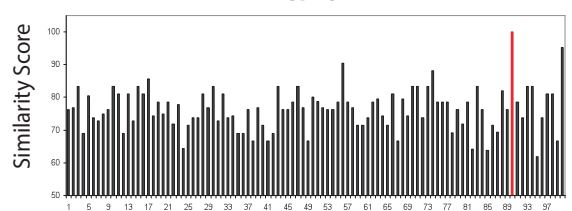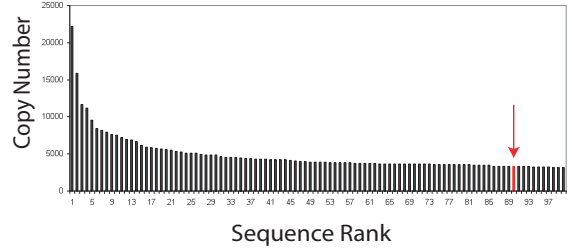

### Sequence Rank

### Sequence Rank

## T Naive

### V $\beta$ 8.2 Germline Sequence

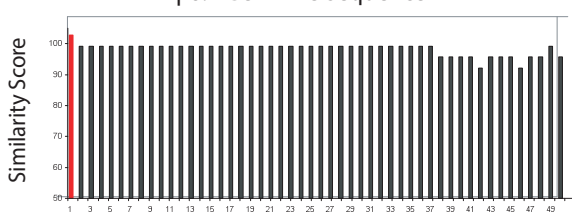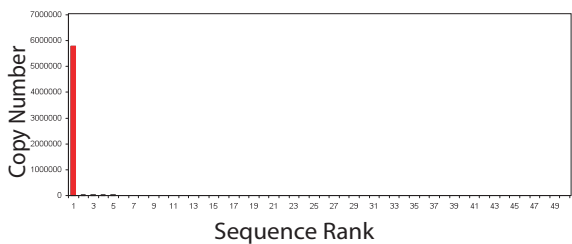

### CDR3

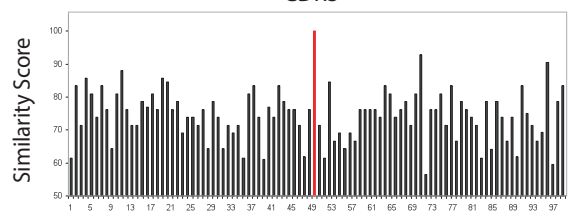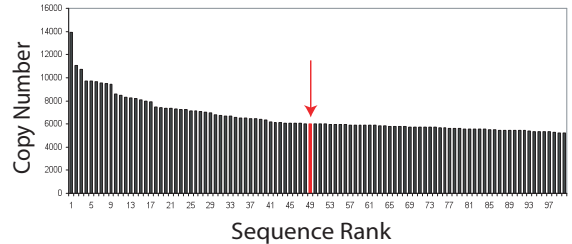

### Sequence Rank

### Sequence Rank

## T Effector Memory

### V $\beta$ 8.2 Germline Sequence

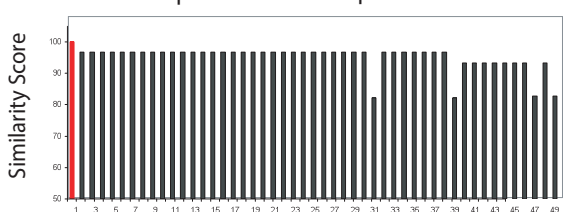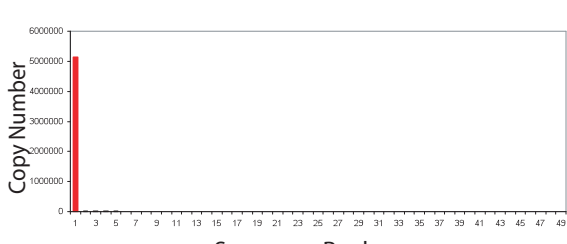

### CDR3

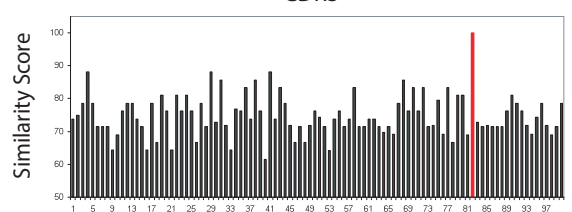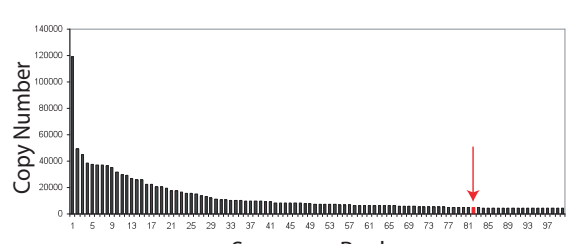

### Sequence Rank

### Sequence Rank
