# Supplementary material
Source: PubMed Central journal article supplement (PMC6066671)

## In-house Software

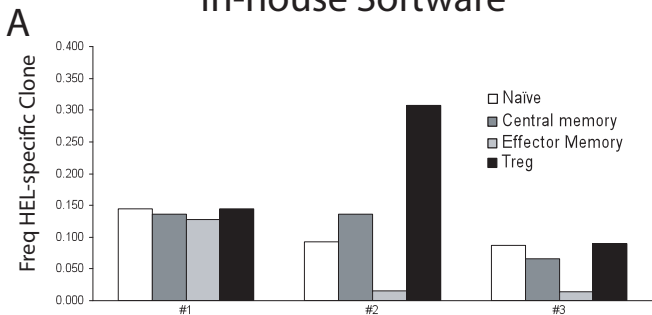

## MiTCR Software

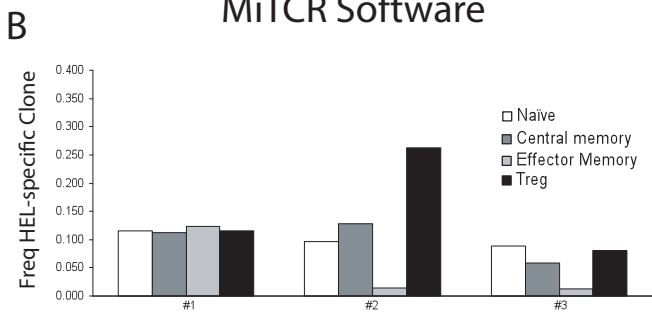

## PBS Immunized

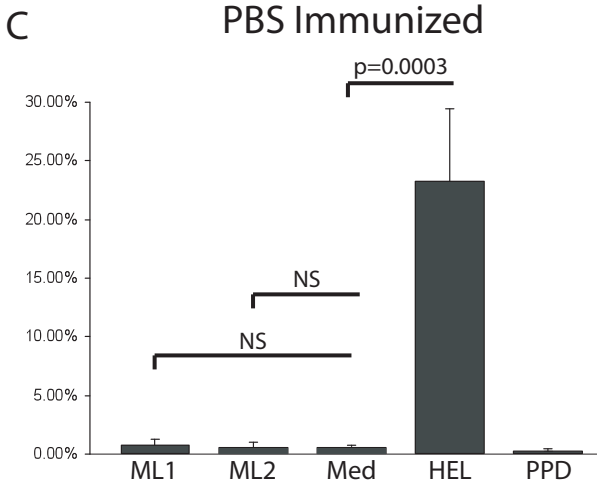

## HEL Immunized

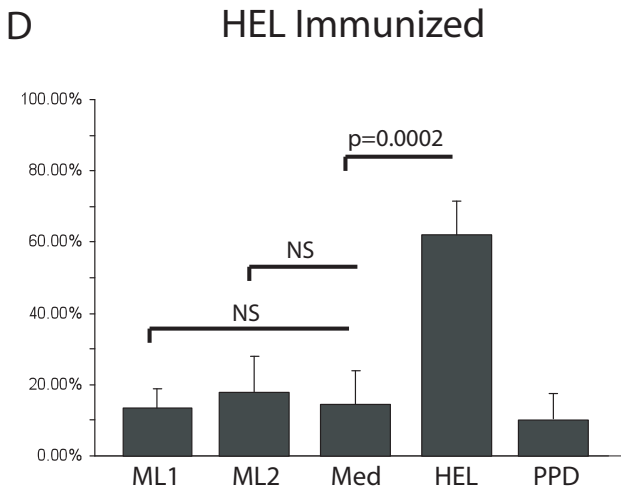

Supplement: NIHMS832505-supplement-1.pdf [file NIHMS832505-supplement-1.pdf]

A

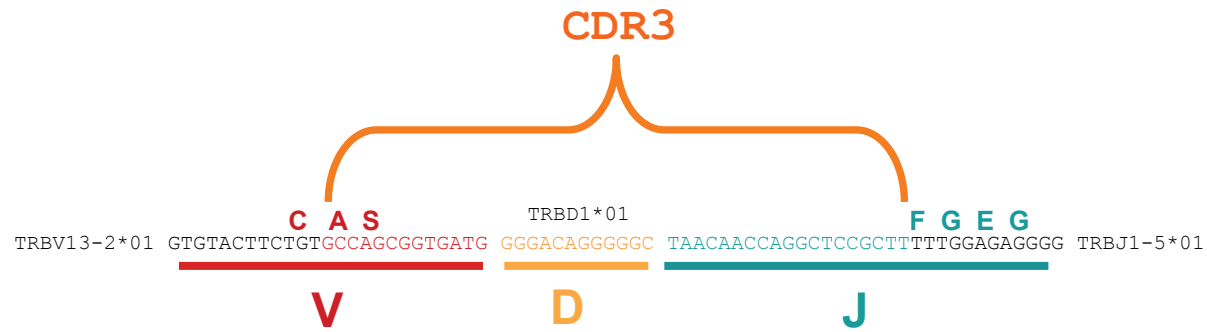

B TRBV13-2\*01

TRBD1\*01

TRBJ1-5\*01

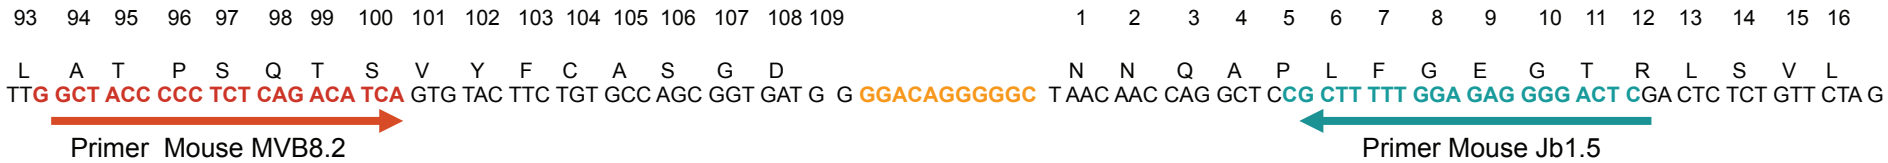

C TRBV13-2\*01

TRBD1\*01

TRBJ1-5\*01

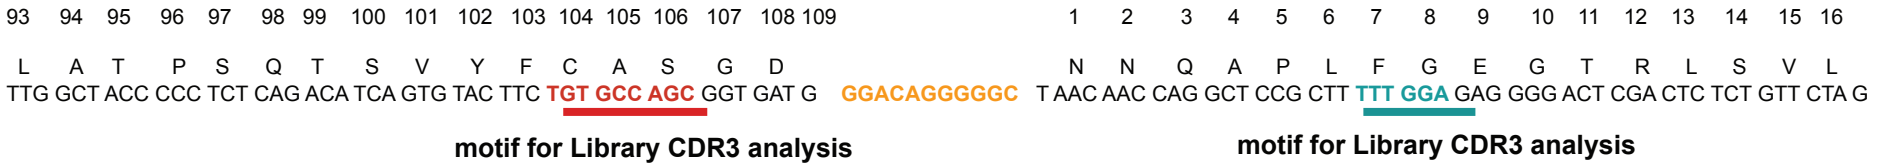

D TRBV13-2\*01

TRBD1\*01

TRBJ1-5\*01

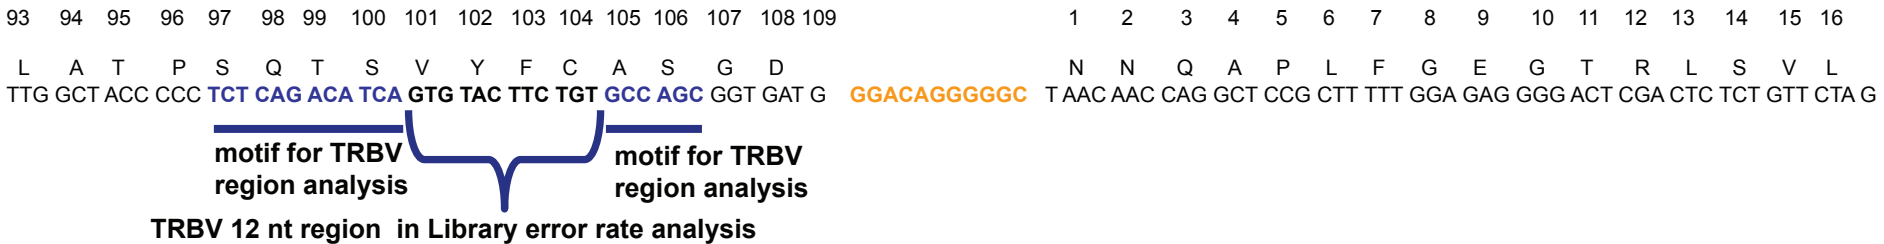

Supplement: NIHMS832505-supplement-2.pdf [file NIHMS832505-supplement-2.pdf]

A

T Central Memory      T Effector Memory

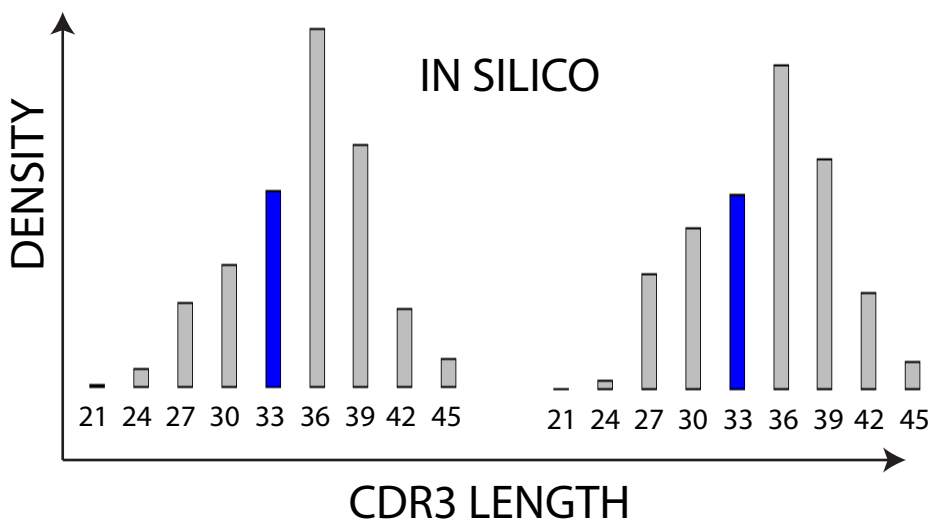

B

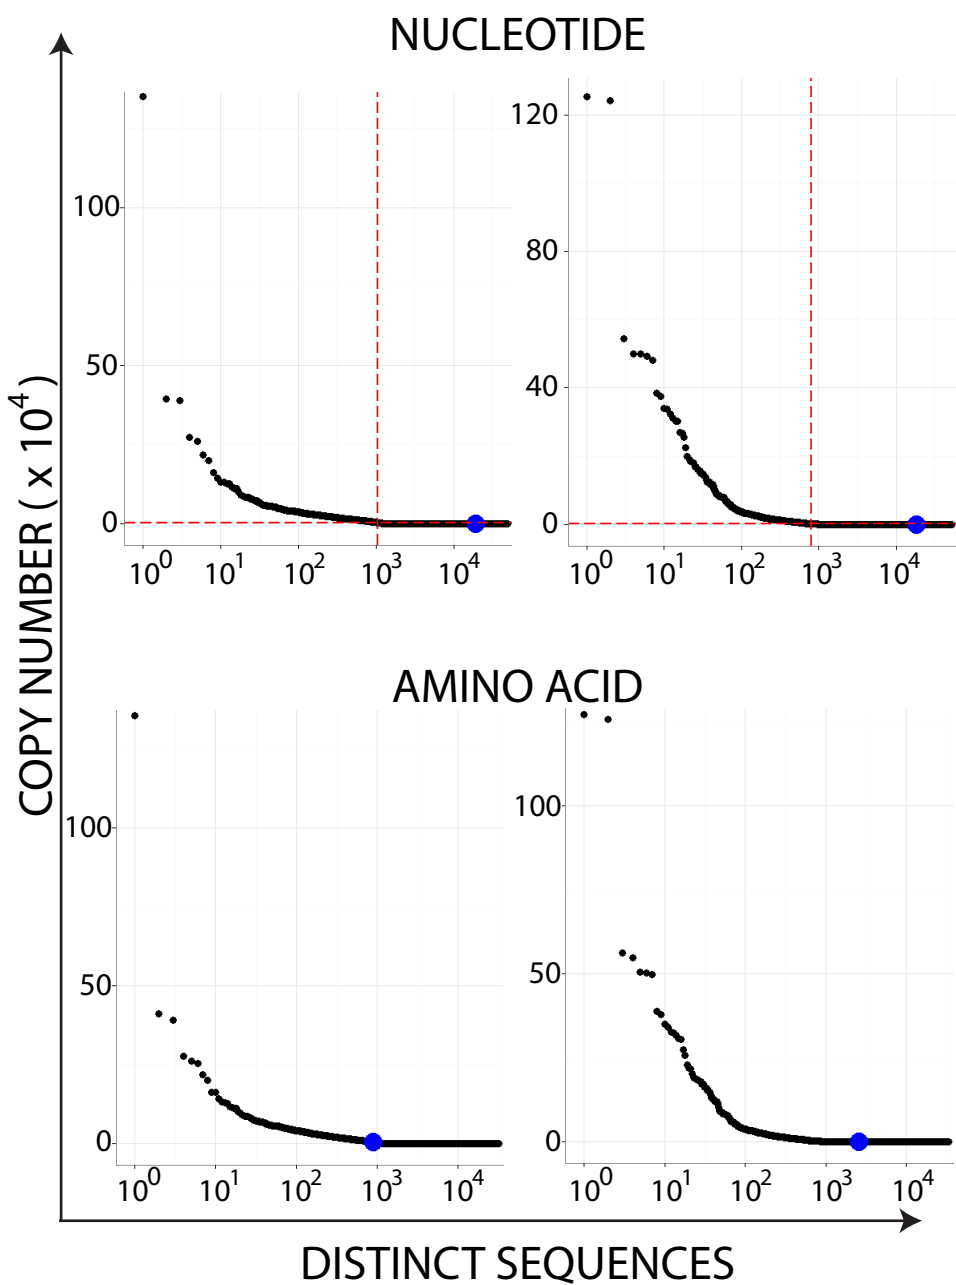

Supplement: NIHMS832505-supplement-3.pdf [file NIHMS832505-supplement-3.pdf]

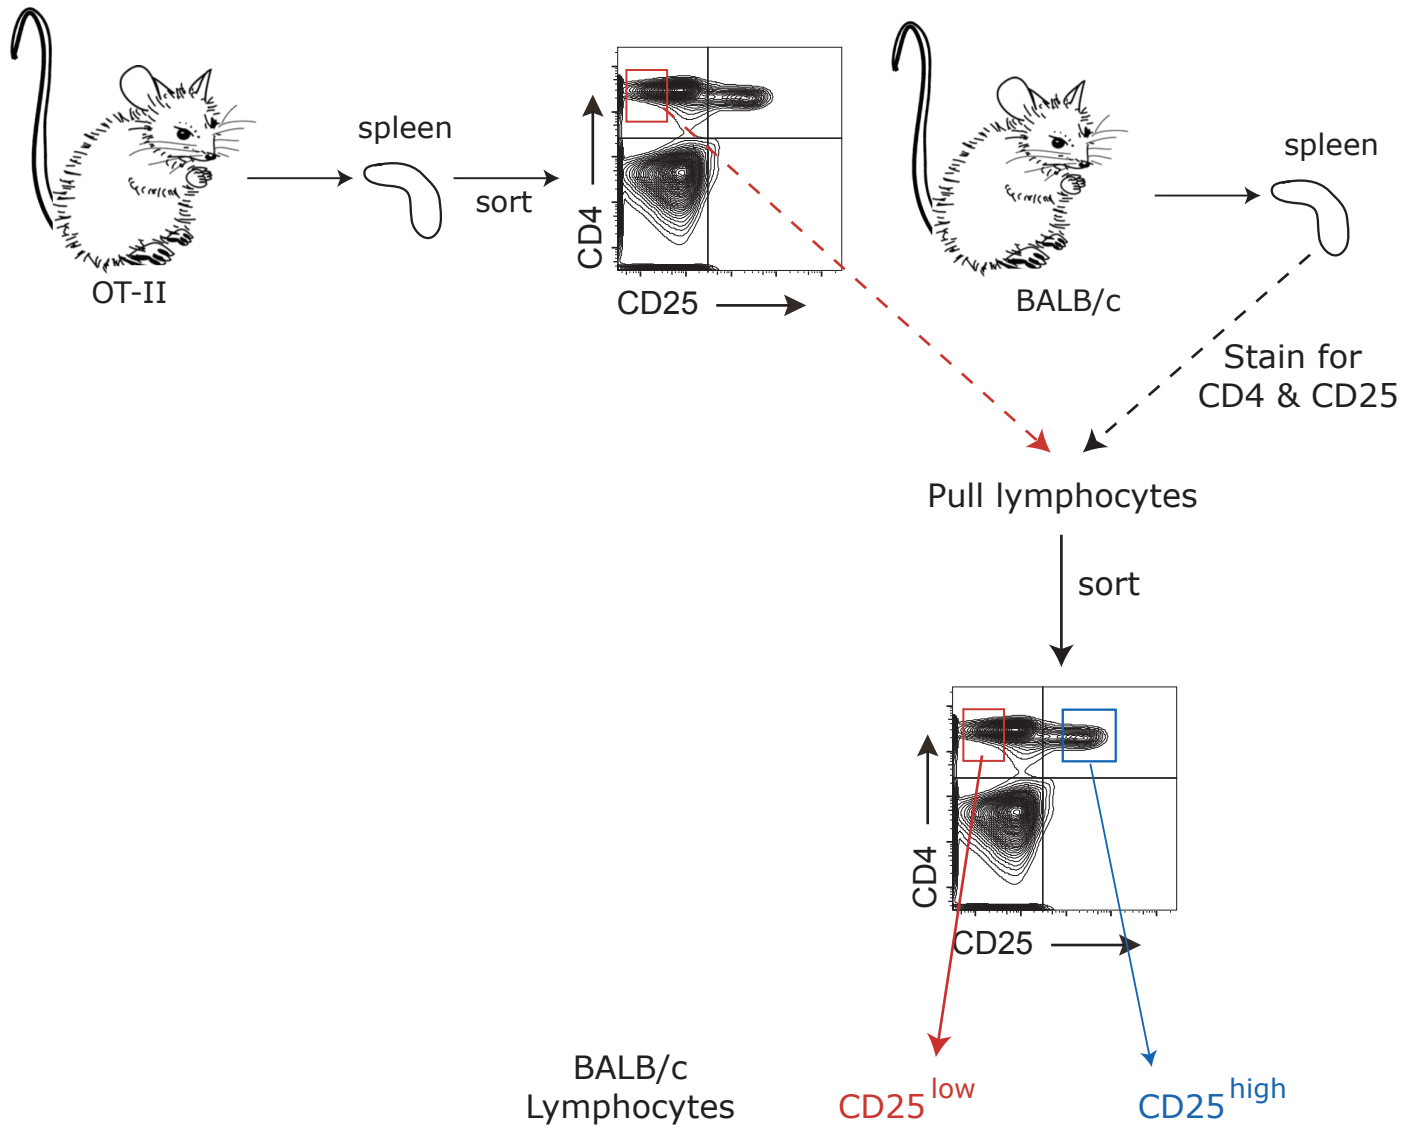

OT-II TCR-Specific  
PCR

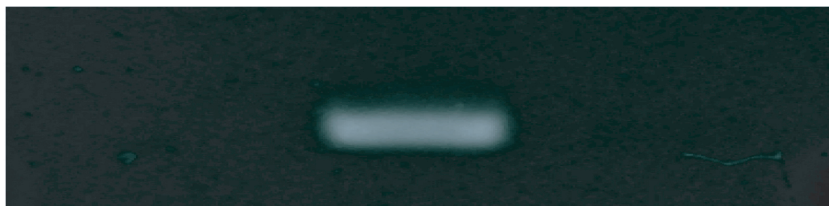

TBP  
(Housekeeping)  
PCR

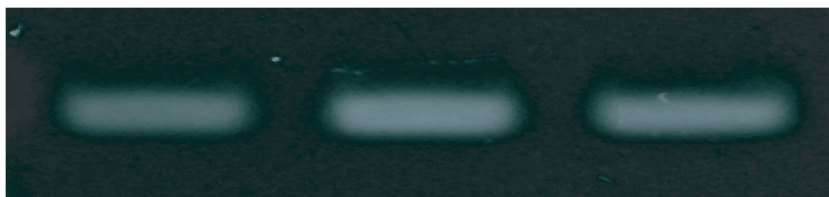

Supplement: NIHMS832505-supplement-5.pdf [file NIHMS832505-supplement-5.pdf]

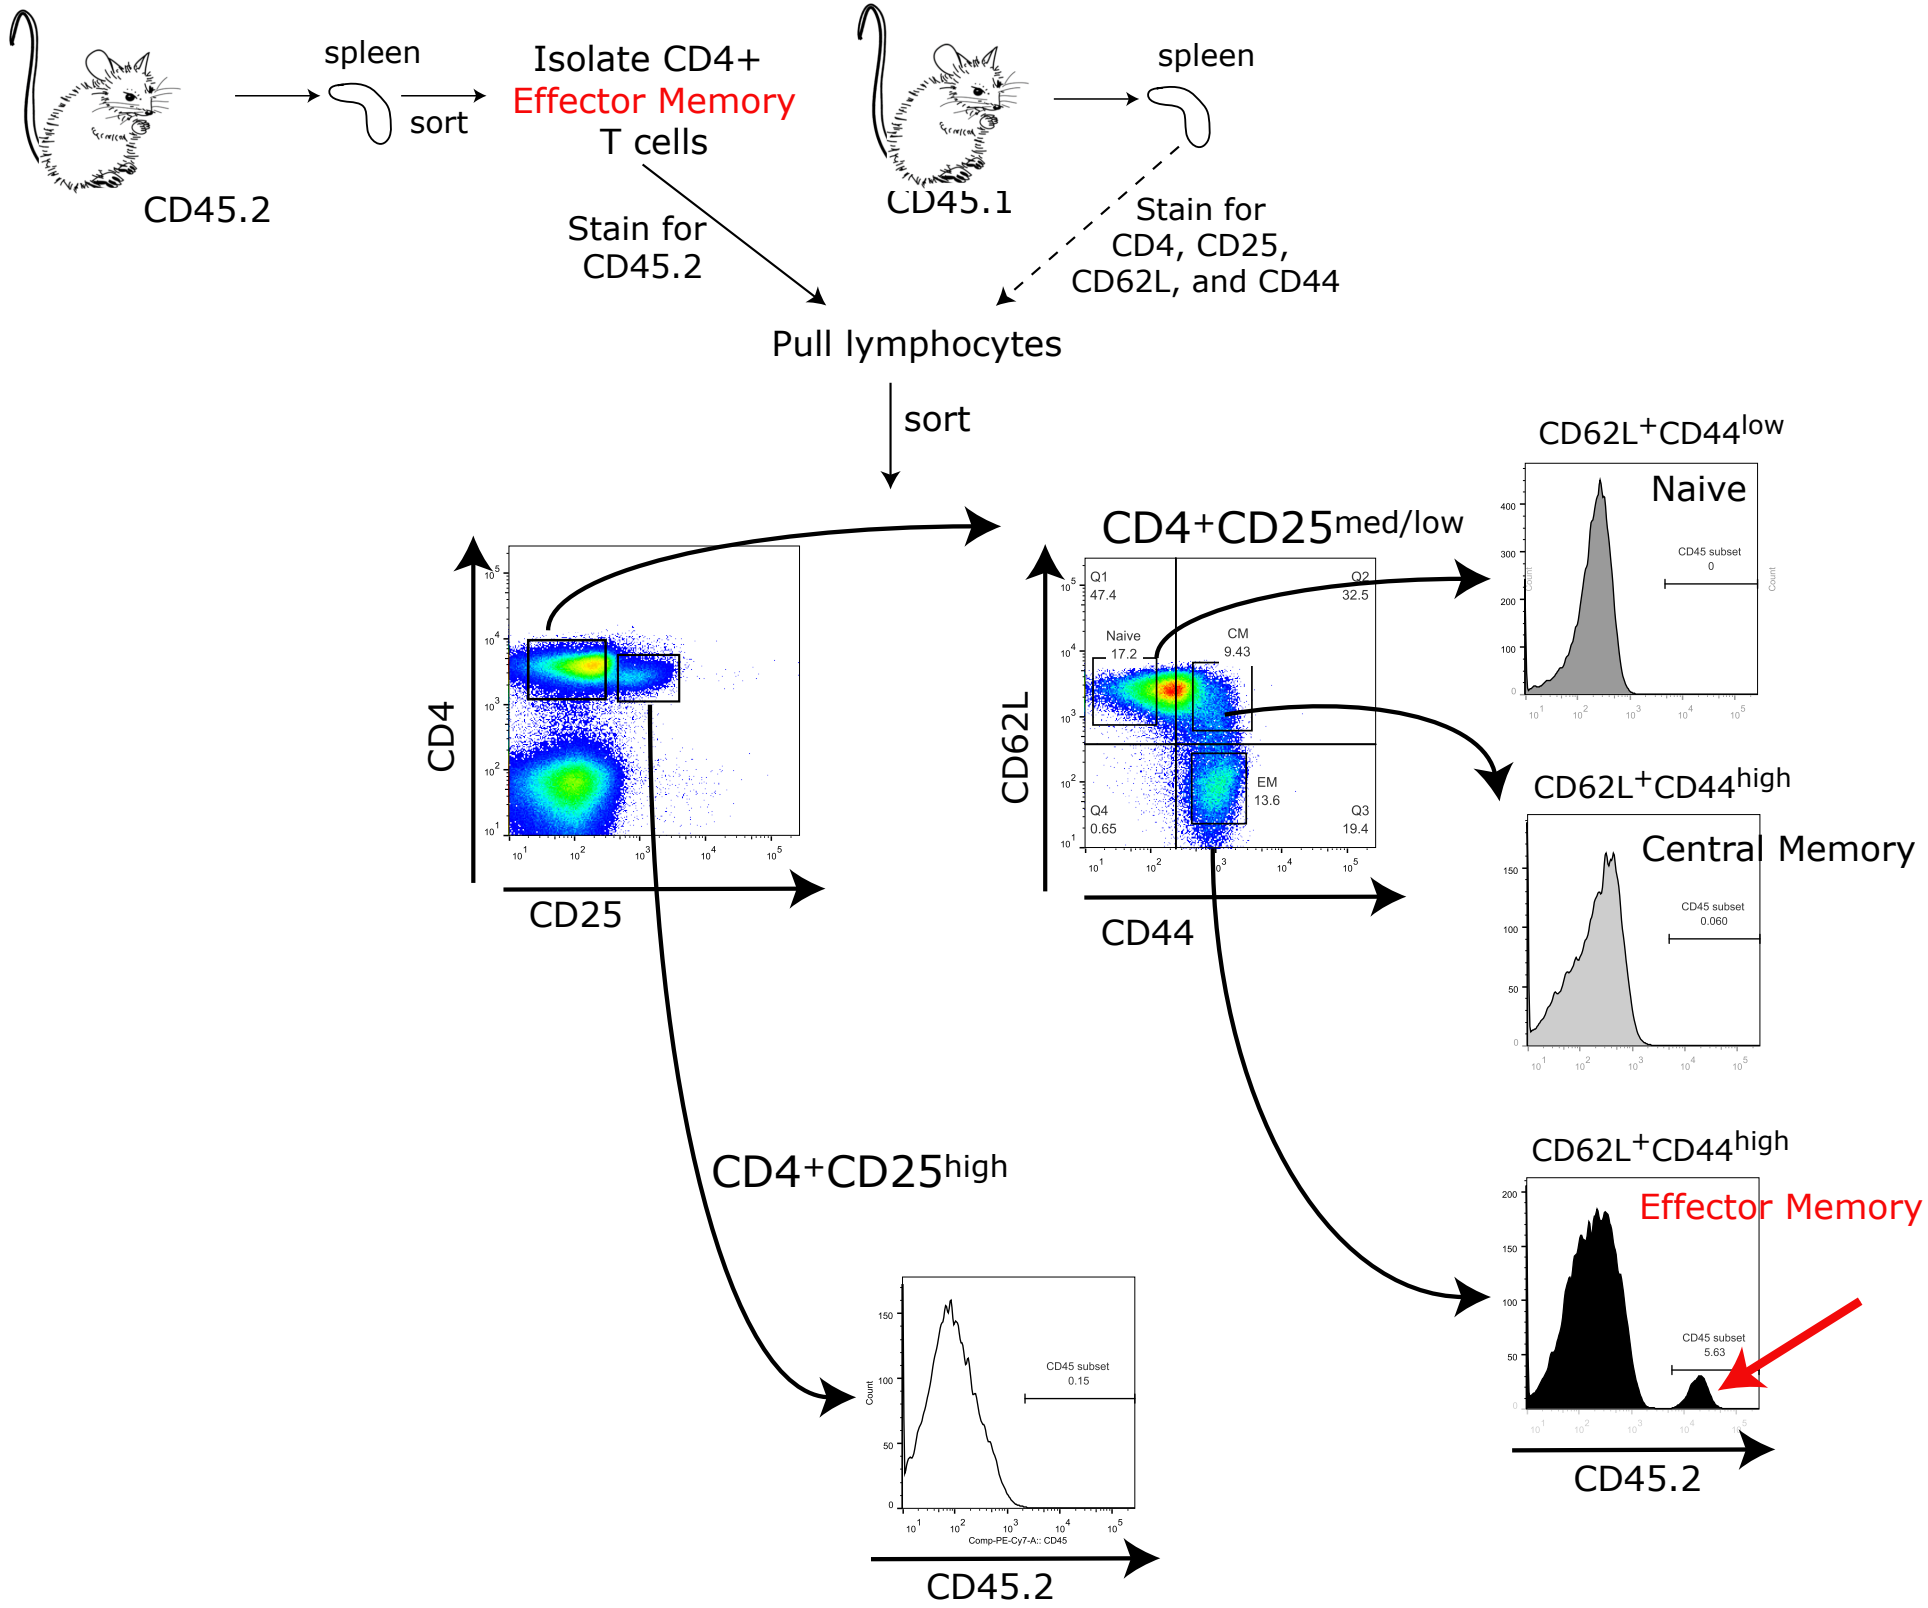

Supplement: NIHMS832505-supplement-6.pdf [file NIHMS832505-supplement-6.pdf]

Negative Selection to enrich for CD4+ T cells

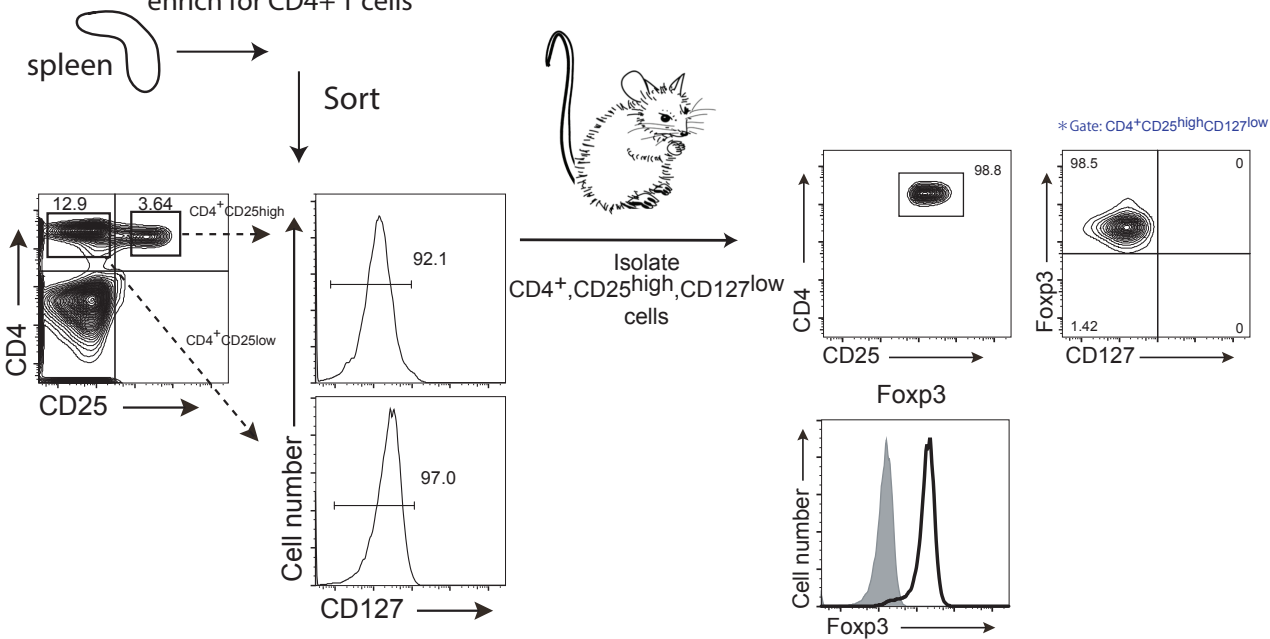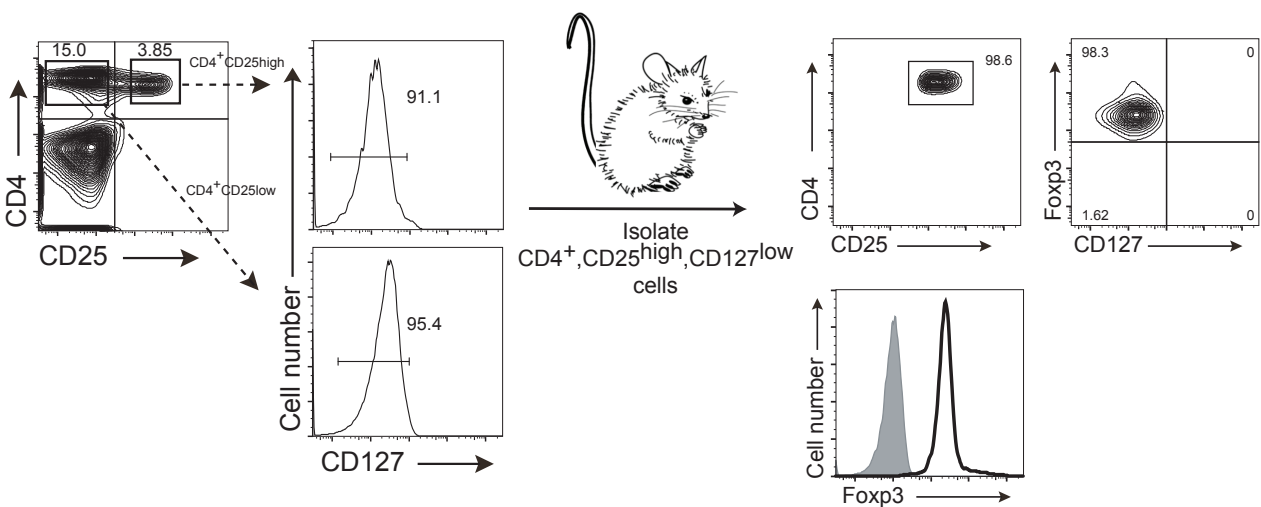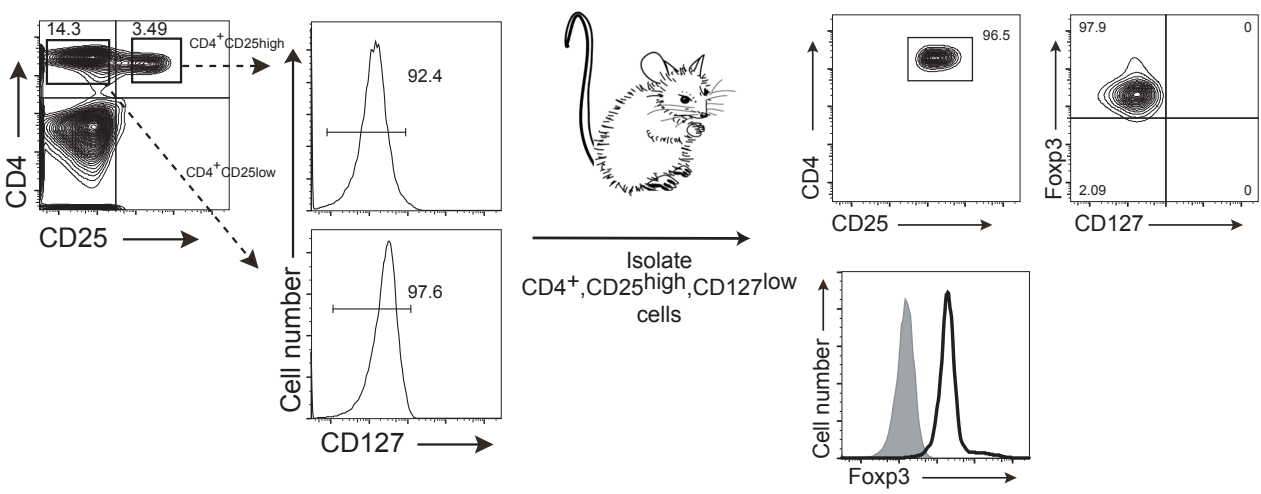

Supplement: NIHMS832505-supplement-7.pdf [file NIHMS832505-supplement-7.pdf]
